# Supplementary material for: New Insight into the Quality Traits of Milk and Cheese from Teramana Goats, a Native Italian Breed
Source: MDPI journal article supplement (doi:10.3390/ani13081344), 2023-04-13
Supplement: s1 [file s1]

## Supplementary materials

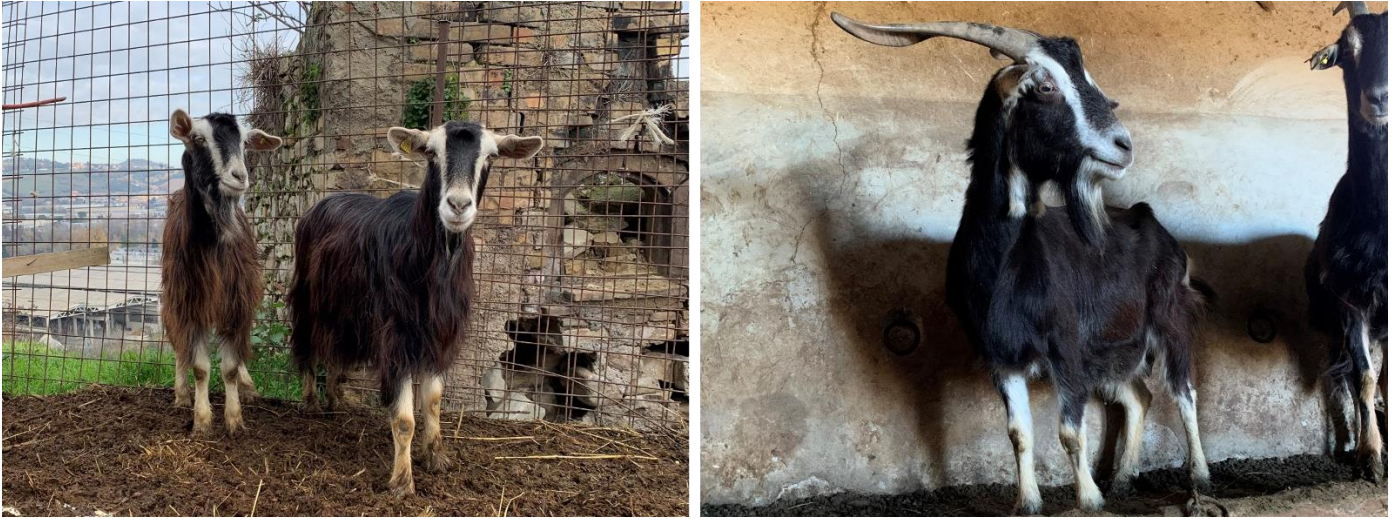

**Figure S1:** A typical goat breed of Teramo, called the Teramana goat. These medium-sized goats have a dark coat (primarily black or dark brown), a long head with white streaks, a straight frontal nasal profile, and the potential for horns in both sexes.

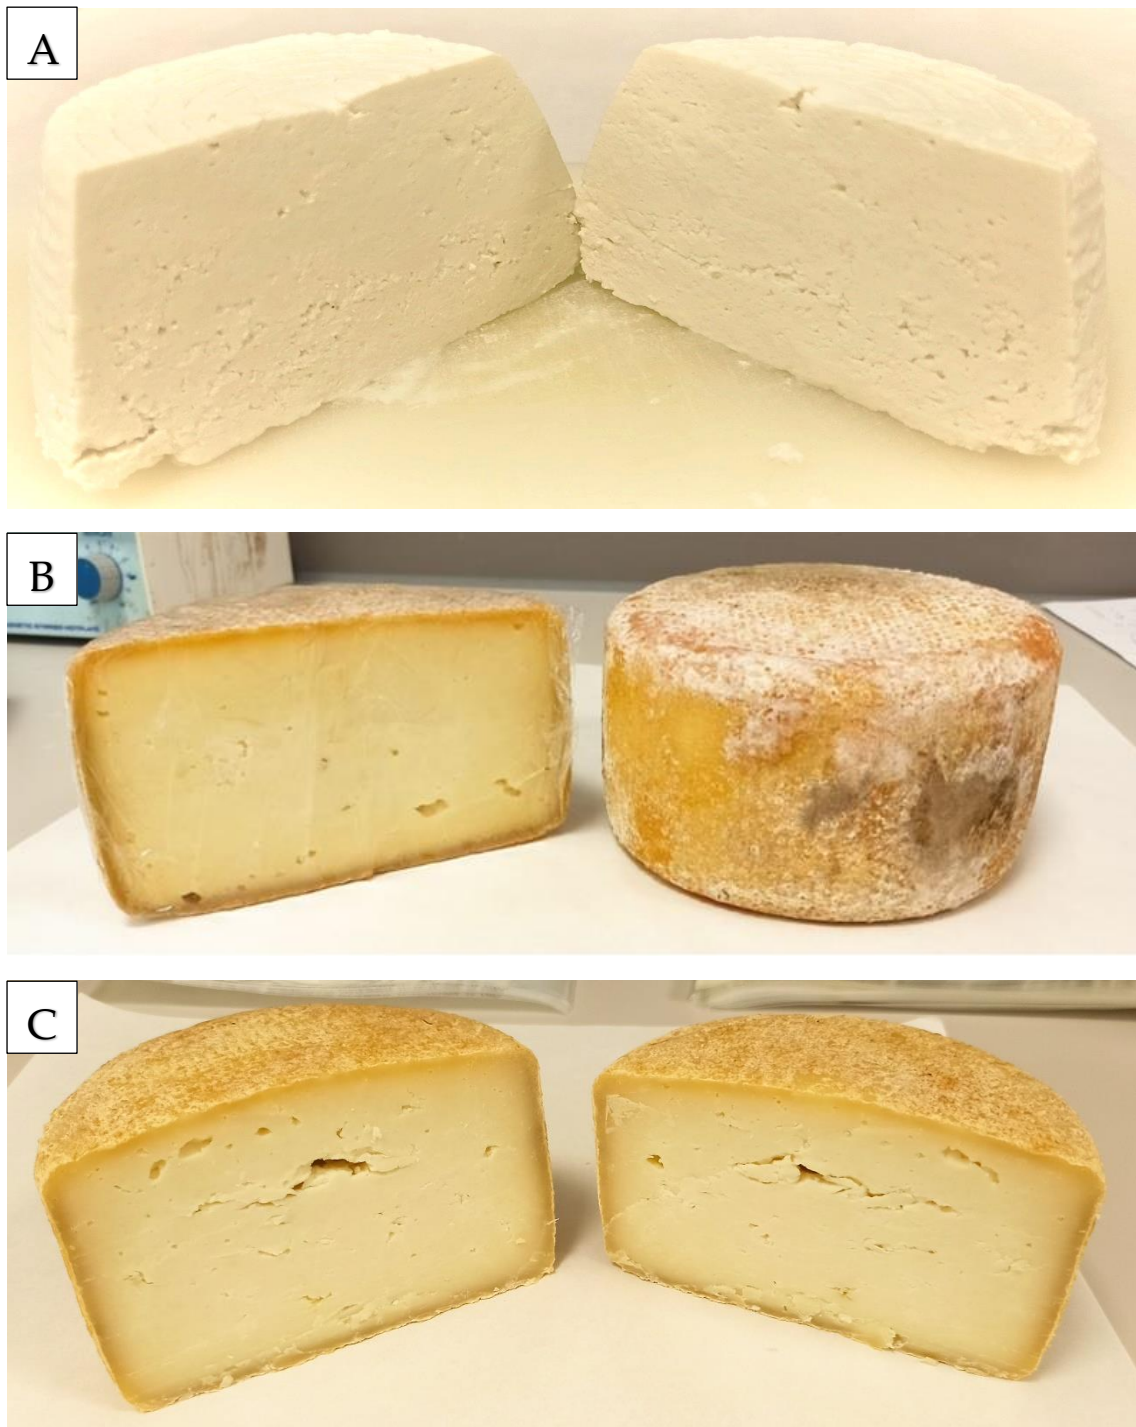

**Figure S2:** Images of Teramana cheeses at 0 (T0, A), 30 (T30, B) and 60 (T60, C) days of ripening.
